# Supplementary material
Source: Springer Nature journal article supplement (https://www.springermedizin.de/resource/supplementary/13005_2008_148_MOESM5_ESM.pdf/9626362)

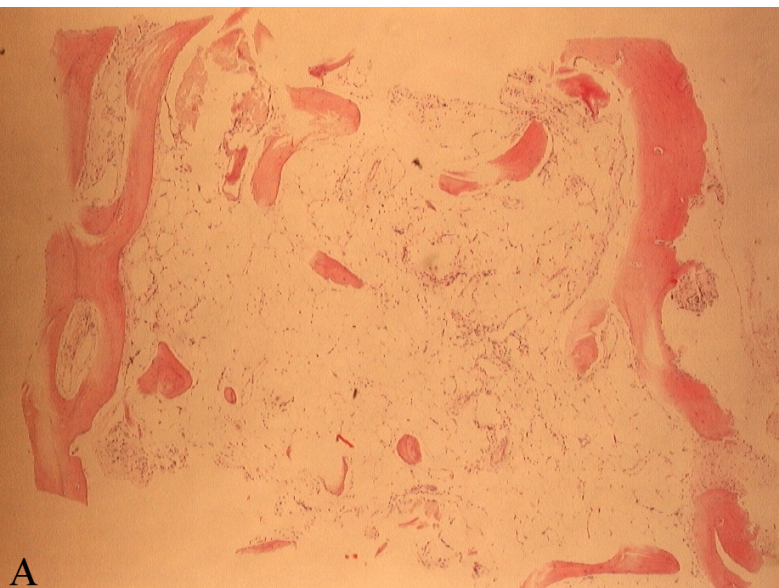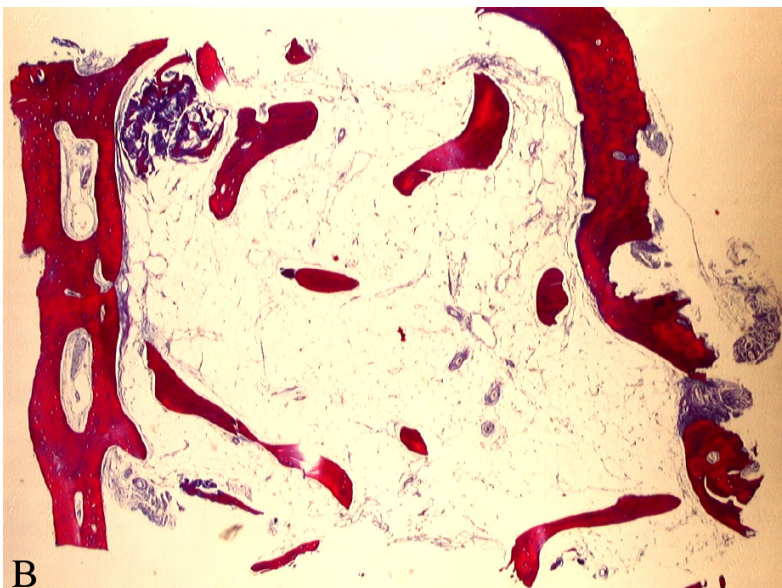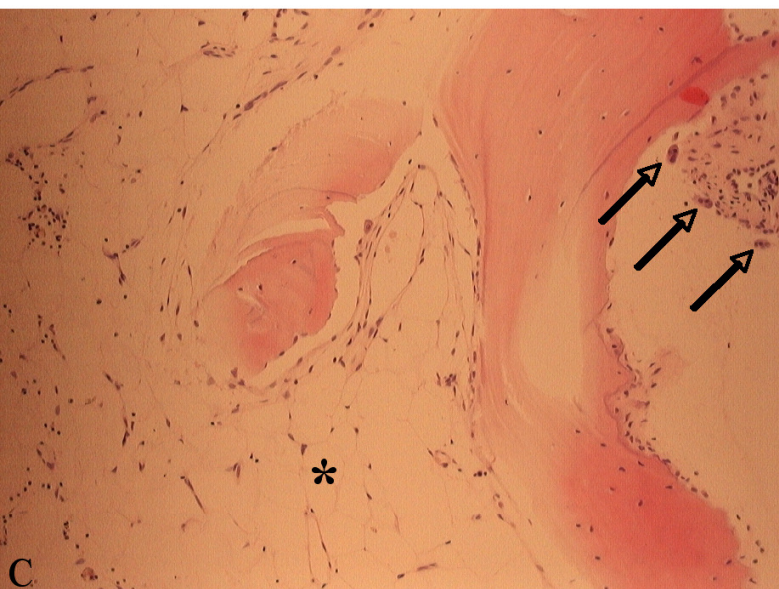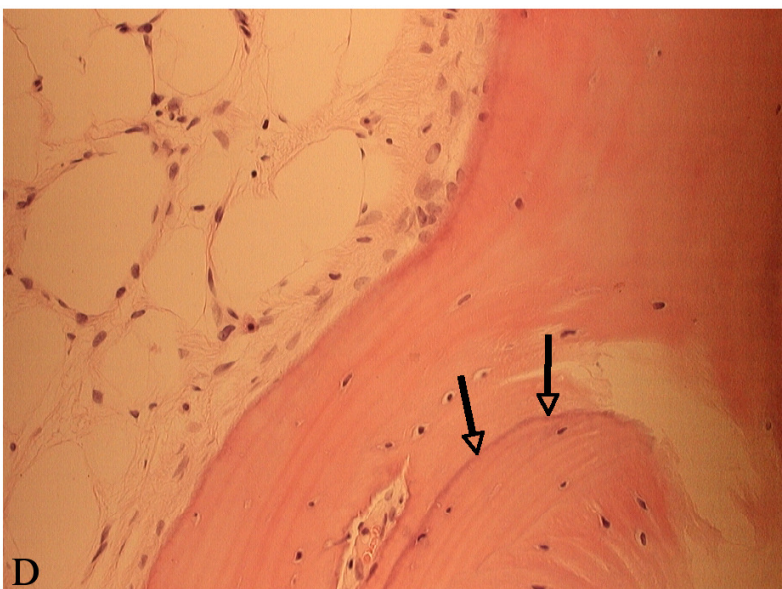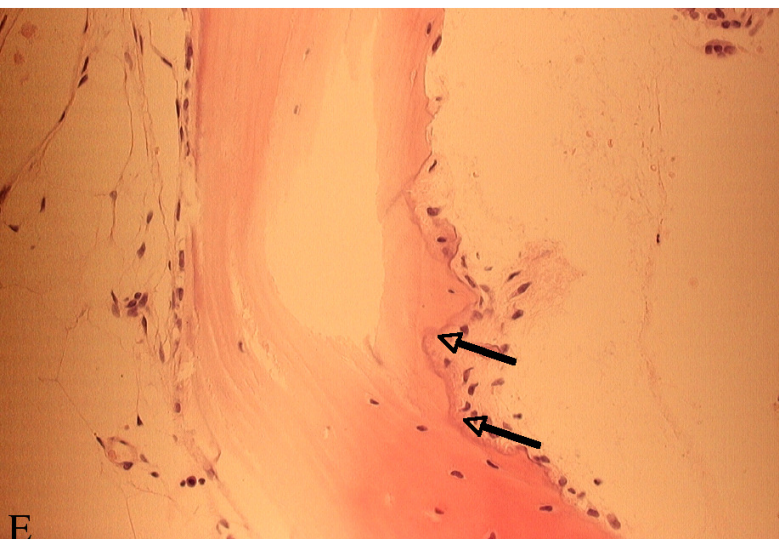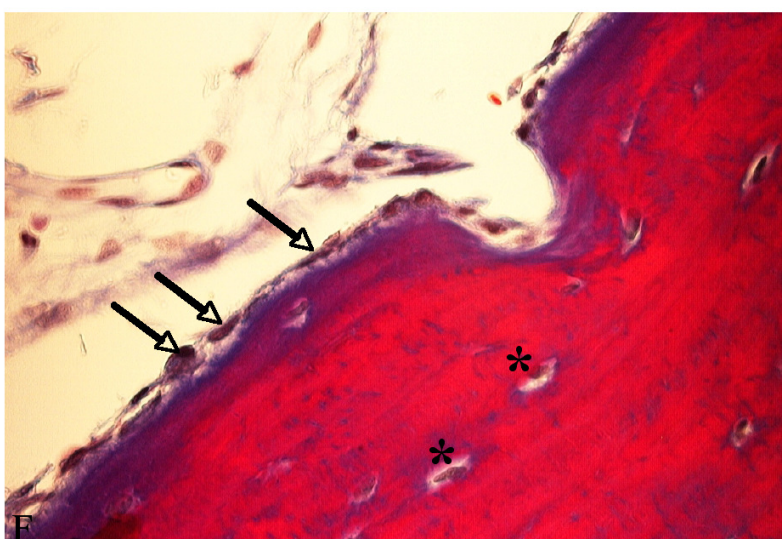

Supplement: MOESM5 [file 9626362]
